# Supplementary material for: Rapid Detection of 2019 Novel Coronavirus SARS-CoV-2 Using a CRISPR-based DETECTR Lateral Flow Assay
Source: PubMed Central journal article supplement — medRxiv. 2020 Mar 27:2020.03.06.20032334. Preprint. [Version 2] doi: 10.1101/2020.03.06.20032334 (PMC7239074; doi:10.1101/2020.03.06.20032334), 2020-03-27
Supplement: NIHPP-2020.03.06.20032334-supplement-1.pdf [file NIHPP-2020.03.06.20032334-supplement-1.pdf]

305 **SUPPLEMENTARY FIGURES**

306

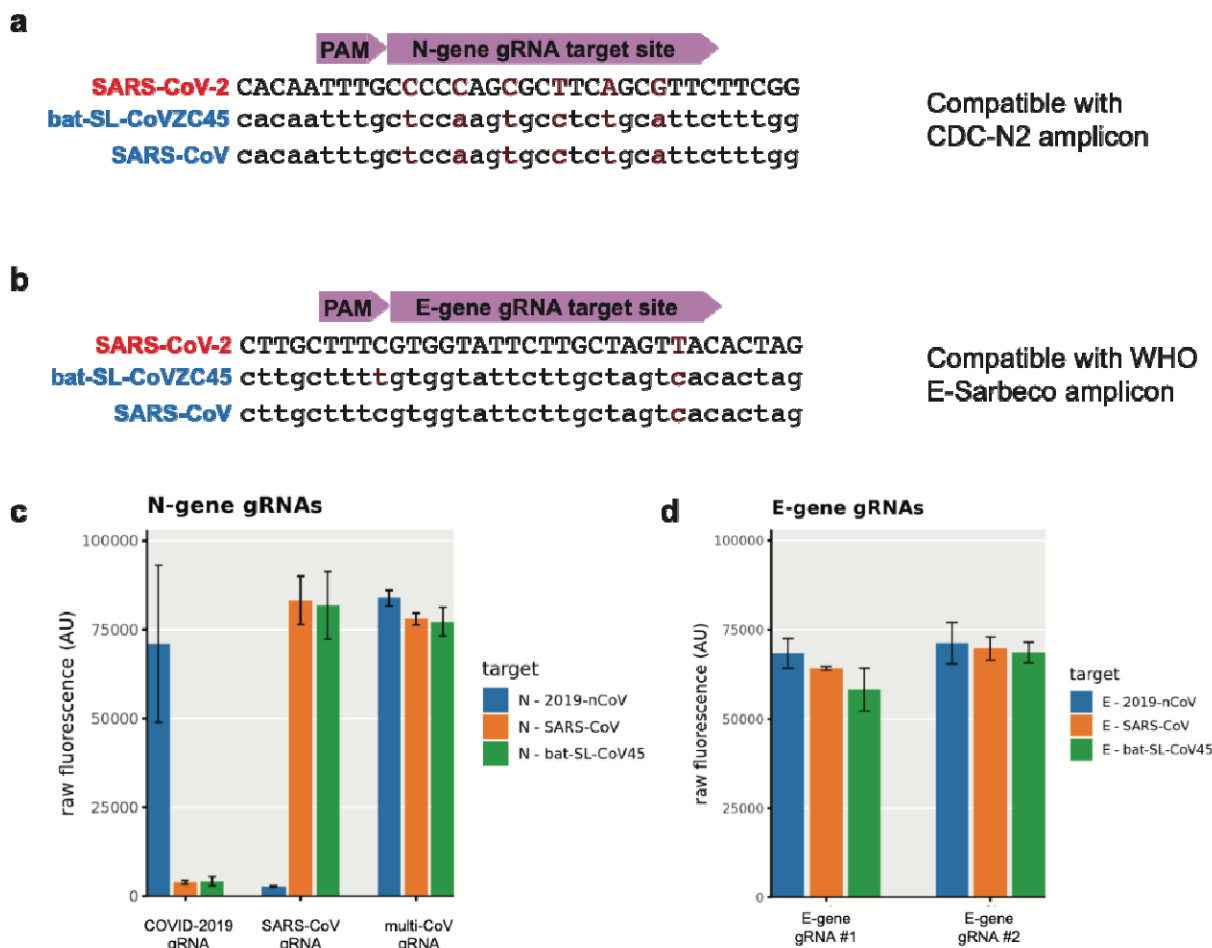

307

308 **Supplementary Figure 1.** Comparison of sequences between SARS-CoV-2, SARS-

309 CoV, and bat-SL-CoVZC45 at the sites targeted by the gRNAs used in this study. **(a)**

310 The N-gene gRNA is compatible with the CDC-N2 amplicon, and **(b)** the E-gene gRNA

311 is compatible with the WHO E-Sarbeco amplicon. **(c-d)** DETECTR fluorescence values

312 using **(c)** N gene gRNAs and **(d)** E gene gRNAs.

313

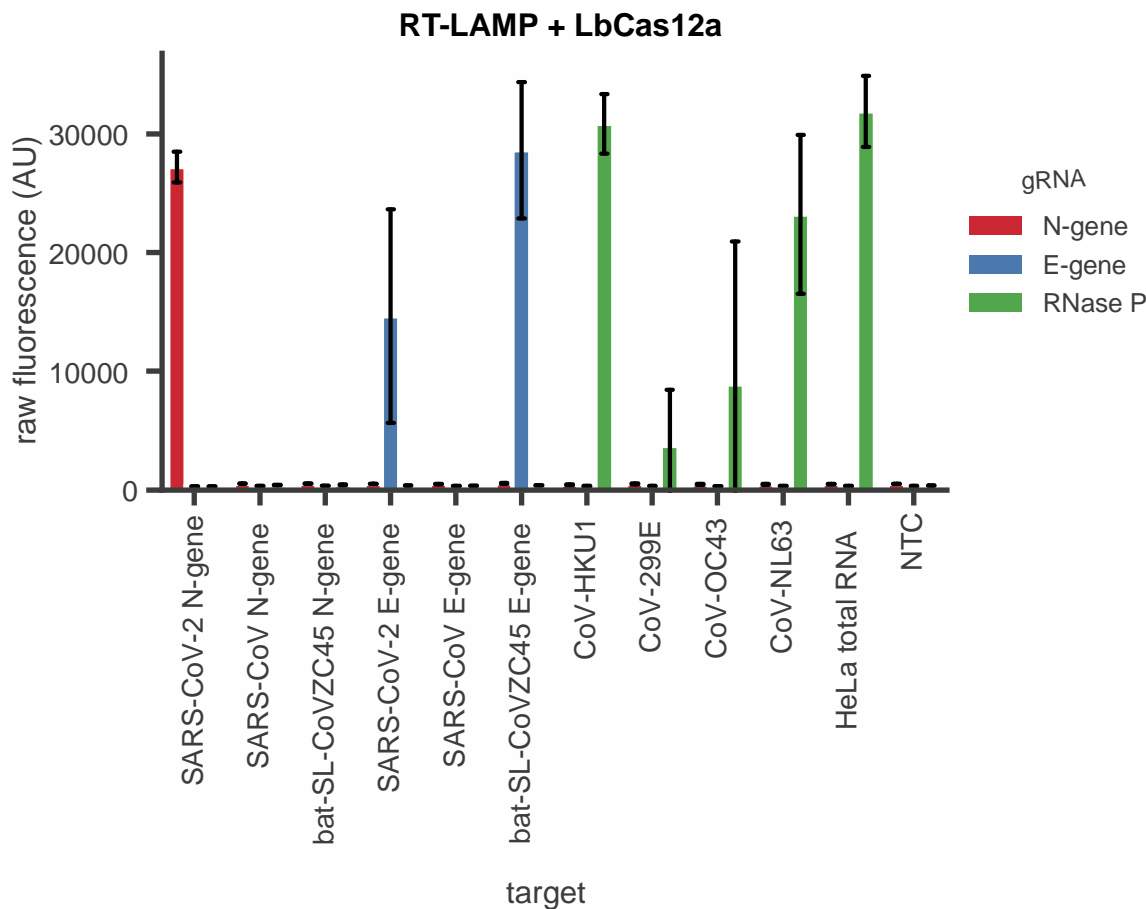

314

315 **Supplementary Figure 2.** Cross-reactivity of DETECTR to common human

316 coronaviruses. SARS-CoV-2 DETECTR assay (RT-LAMP + Cas12a) was evaluated on

317 IVT RNA products from SARS-CoV-2, SARS-CoV, bat-SL-CoVZC45, and clinical

318 samples from common human coronaviruses. As expected, the N-gene is only detected

319 in SARS-CoV-2, whereas the E-gene is detected only in SARS-CoV-2 and bat-SL-

320 CoVZC45. SARS-CoV E-gene was not detected as the RT-LAMP primer set is not

321 capable of amplifying the SARS-CoV E-gene, even though the E-gene gRNA is capable

322 of detecting the SARS-CoV E-gene target site. RNase P is detected in common human

323 coronaviruses because these samples are RNA extracted from clinical samples. Result

324 shown at 15 min of LbCas12a detection assay signal on fluorescent plate reader.

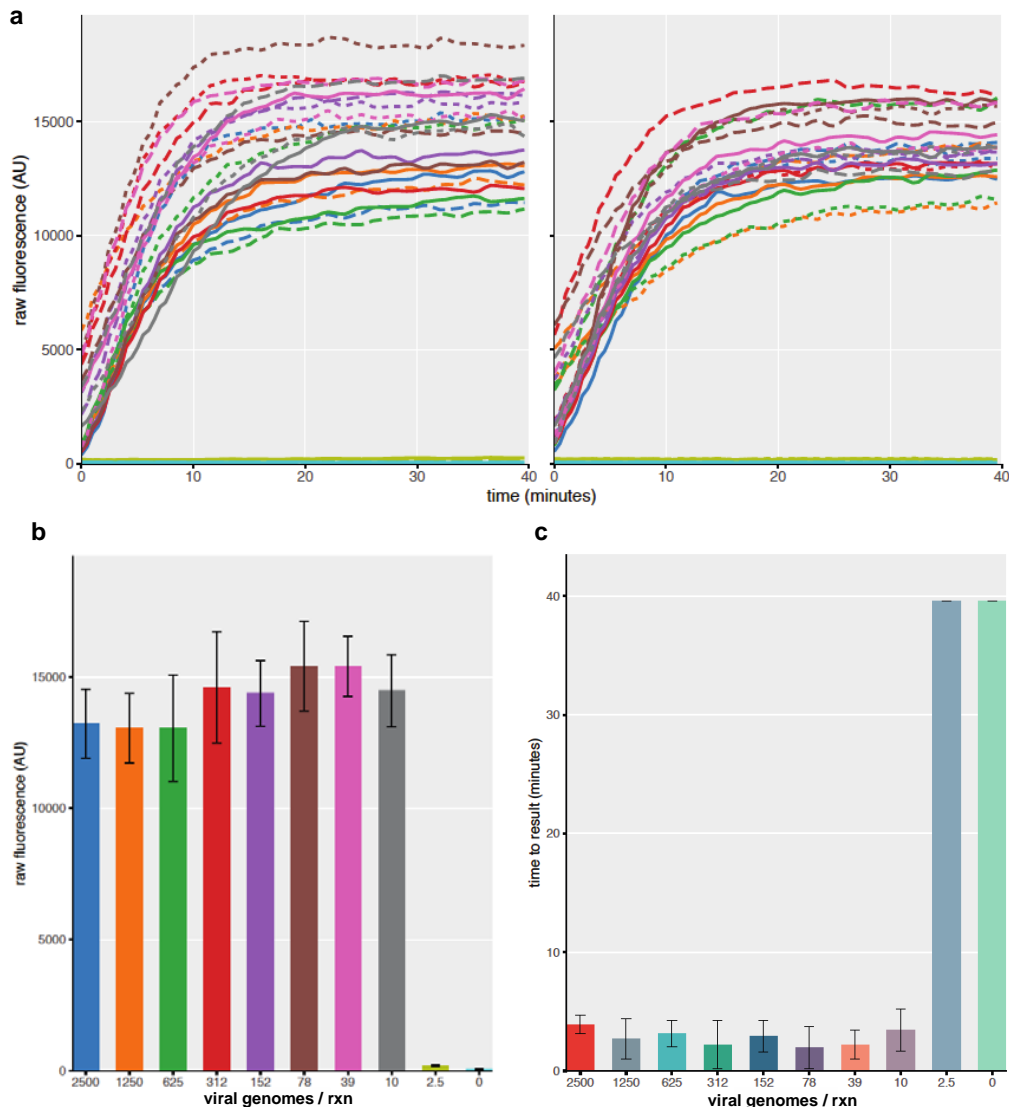

325

326 **Supplementary Figure 3.** DETECTR analysis of SARS-CoV-2 identifies down to 10

327 viral genomes in approximately 30 min. Duplicate LAMP reactions were amplified for

328 twenty min followed by LbCas12a DETECTR analysis. **(a)** Raw fluorescence curves

329 generated by LbCas12a detection of SARS-CoV-2 N-gene (n=6) show saturation in less

330 than 20 min. **(b)** Further analysis reveals the limit of detection of the SARS-CoV-2 N-

331 gene to be 10 viral genomes per reaction (n=6). **(c)** Evaluation of the time to result of

332 these reactions highlights detection of 10 viral genomes of SARS-CoV-2 in under 5 min

333 (n=6).

334

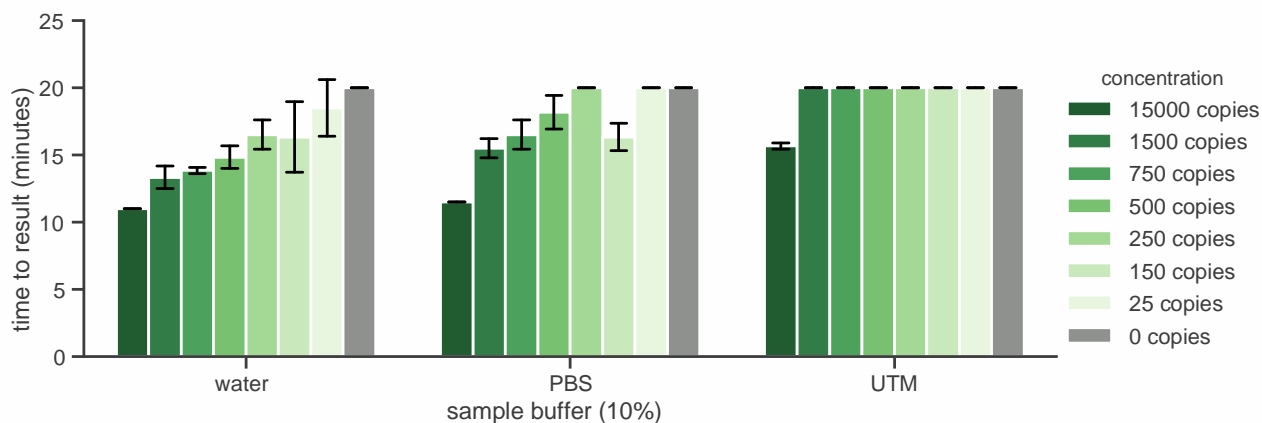

335 **Supplementary Figure 4.** Impact of sample buffers on performance of RT-LAMP pre-  
336 amplification. Time-to-result for RT-LAMP amplification (lower value indicates faster  
337 amplification) with 10% universal transport medium (UTM), 10% PBS, or 10% water  
338 final volume for the SARS-CoV-2 N-gene on a standard curve of the 2019-nCoV  
339 positive control plasmid (IDT) in 10% reaction volume. Results indicate that 10% PBS  
340 inhibits the assay less than 10% UTM.  
341

342

343

344

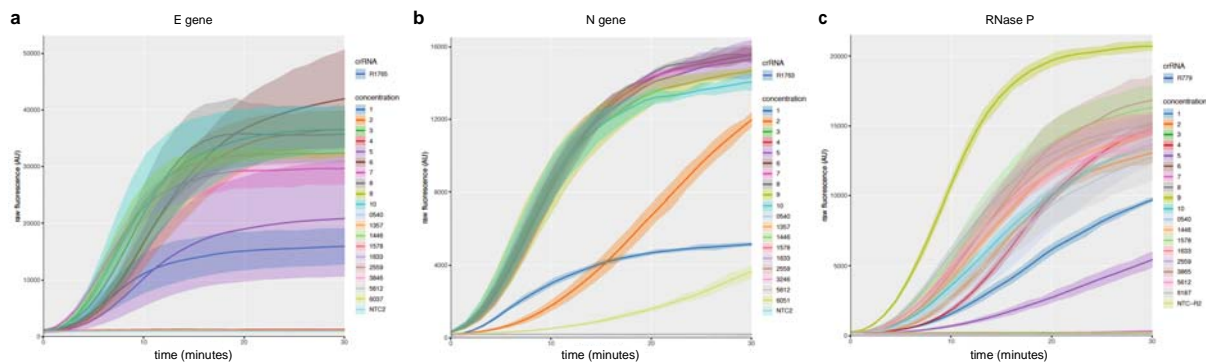

345

346 **Supplementary Figure 5.** DETECTR kinetic curves on COVID-19 infected patient  
347 samples. Ten nasopharyngeal/oropharyngeal swab samples from 5 patients (COVID19-  
348 1 to COVID19-5) were tested for SARS-CoV-2 using two different genes, N2 and E as  
349 well as a sample input control, RNase P. **(a)** Using the standard amplification and  
350 detection conditions, 9 of the 10 patient samples resulted in robust fluorescence curves  
351 indicating presence of the SARS-CoV-2 E-gene (20-minute amplification, signal within  
352 10 min). **(b)** The SARS-CoV-2 N-gene required extended amplification time to produce  
353 strong fluorescence curves (30-minute amplification, signal within 10 min) for 8 of the 10  
354 patient samples. **(c)** As a sample input control, RNase P was positive for 17 of the 22  
355 total samples tested (20-minute amplification, signal within 10 min).

356

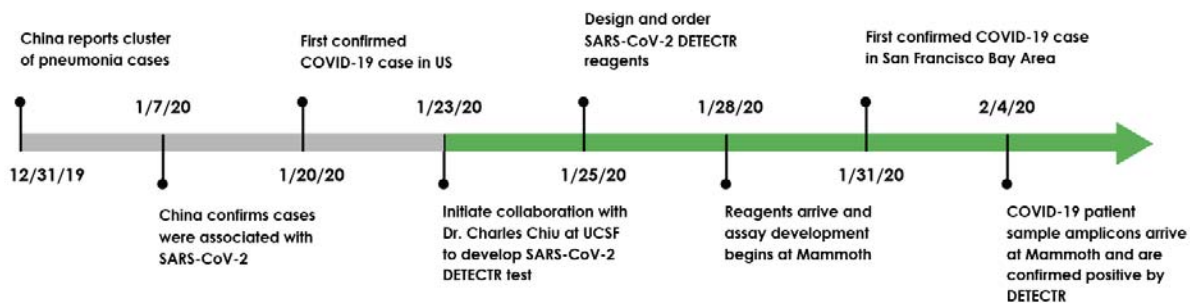

357  
358 **Supplementary Figure 6.** Timeline showing major events in the progression of COVID-  
359 19 detection and assay development.

360
